# Supplementary material
Source: PubMed Central journal article supplement (PMC11623384)
Supplement: ehp14585.smcontents.508.pdf [file ehp14585.smcontents.508.pdf]

**Note to readers with disabilities:** *EHP* strives to ensure that all journal content is accessible to all readers. However, some figures and Supplemental Material published in *EHP* articles may not conform to [508 standards](#) due to the complexity of the information being presented. If you need assistance accessing journal content, please contact [ehpsubmissions@niehs.nih.gov](mailto:ehpsubmissions@niehs.nih.gov). Our staff will work with you to assess and meet your accessibility needs within 3 working days.

### **Supplemental Material**

#### **Association of Tailpipe-Related and Nontailpipe-Related Air Pollution Exposure with Cognitive Decline in the Chicago Health and Aging Project**

Ryan M. Andrews, Sara D. Adar, Adam A. Szpiro, Joel D. Kaufman, Cami N. Christopher, Todd L. Beck, Klodian Dhana, Robert S. Wilson, Kumar B. Rajan, Denis Evans, and Jennifer Weuve

#### **Table of Contents**

##### **R Code**

**Figure S1.** Timeline of CHAP (1993-2012) indicating (i) windows during which participants were recruited/enrolled into CHAP, (ii) the window in which we have NO<sub>x</sub> and NO<sub>2</sub> predicted concentrations, and (iii) the temporal ordering of TRAP exposure windows and the period in which participants were followed for cognitive decline.

**Figure S2.** Algorithm by which we assigned participants in our analyses a 3-year exposure window, which in turn determined their analytic baseline.

**Table S1.** Dataset containing 5 hypothetical participants in our study who entered CHAP at different times.

**Table S2.** C-statistics from models predicting either continuation due to not dropping out or continuation due to not dying among participants in our analytic sample (N=6,061).

**Table S3.** Results from pooled logistic regression models for dropout or death in our analytic sample (N=6,061), adjusting for NO<sub>x</sub> and other relevant covariates.

**Table S4.** Results from pooled logistic regression models for dropout or death in our analytic sample (N=6,061), adjusting for NO<sub>2</sub> and other relevant covariates.

**Table S5.** Results from pooled logistic regression models for dropout or death in our analytic sample (N=6,061), adjusting for PM<sub>2.5-10,Cu</sub> and other relevant covariates.

**Table S6.** Results from pooled logistic regression models for dropout or death in our analytic sample (N=6,061), adjusting for  $PM_{2.5-10,Zn}$  and other relevant covariates.

**Table S7.** Spearman rank correlations of predicted annual average  $NO_x$  concentrations, from 1999 through 2012, at all CHAP locations (N=8,473 unique locations).

**Table S8.** Spearman rank correlations of predicted annual average  $NO_2$  concentrations, from 1999 through 2012, at all CHAP locations (N=8,473 unique locations).

**Table S9.** Spearman rank correlations between estimated TRAP concentrations, averaged over 3 years prior to analytic baseline, and community noise levels (N=6,601).
